# Supplementary material for: An Inverse Relation between Hyperglycemia and Skeletal Muscle Mass Predicted by Using a Machine Learning Approach in Middle-Aged and Older Adults in Large Cohorts
Source: MDPI journal article supplement (doi:10.3390/jcm10102133), 2021-05-14

Supplemental figure S1: Age distribution of Ansan/Ansung and city hospital-based cohorts.

A. Ansan/Ansung cohort

B. City hospital-based cohort

C. Train and test sets in Ansan/Ansung cohort for predicting skeletal muscle mass

D. Train and test sets in Ansan/Ansung cohort for predicting fat mass

A.

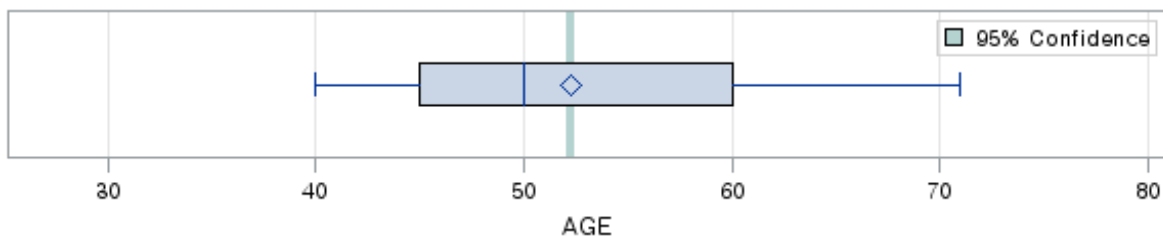

B.

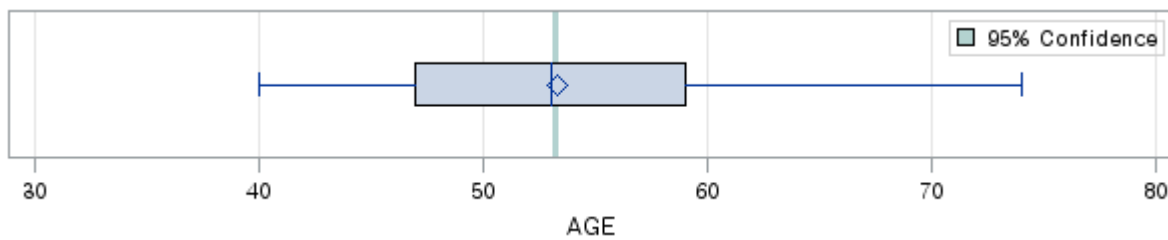

C.

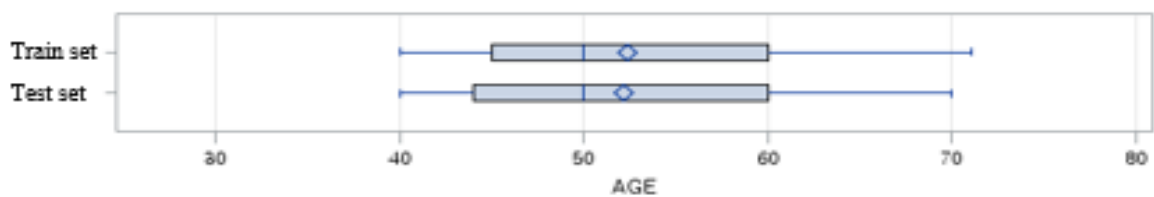

D.

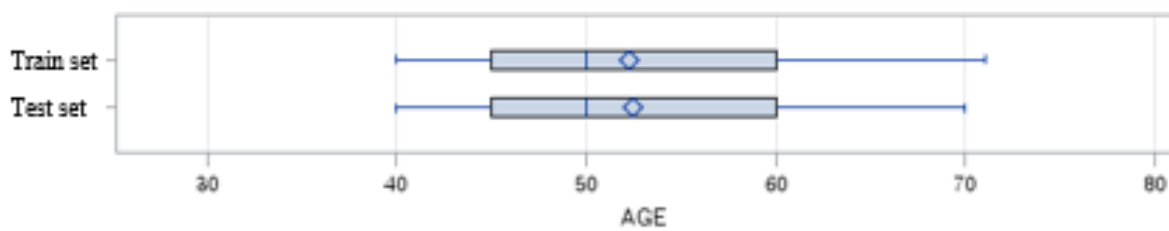

Supplement: s1 [file s1]
